# Supplementary material for: Social reactivation of fear engrams enhances memory recall
Source: PubMed Central journal article supplement — Proc Natl Acad Sci U S A. 2022 Mar 14;119(12):e2114230119. doi: 10.1073/pnas.2114230119 (PMC8944571; doi:10.1073/pnas.2114230119), 2022-03-14
Supplement: pnas.2114230119.sapp.pdf [file pnas.2114230119.sapp.pdf]

Supplementary Materials for

**Social Reactivation of Fear Engrams Enhances Recall**

Abby Basya Finkelstein, Héloïse Leblanc, Rebecca Cole, Troy Gallerani, Anahita Vieira, Yosif Zaki, Steve Ramirez

Correspondence to: [afinkelstein@fas.harvard.edu](mailto:afinkelstein@fas.harvard.edu) and [dvsteve@bu.edu](mailto:dvsteve@bu.edu)

**This PDF file includes:**

Supplementary Text  
Figs. S1 to S5  
Captions for Movies S1 to S2  
Captions for Datasets S1 to S7

**Other Supplementary Materials for this manuscript include the following:**

Movies S1 to S2  
Datasets S1 to S7

## Supplementary Text

### *Statistical Analysis Details*

**Figure 2:** Socially salient but not directly stressful experience reactivate pre-existing fear ensembles

**Fig. 2d:** Males, 1-sample t-test: DG Restraint  $t=0.0667$ ,  $df=4$ ,  $p=0.95$ ; Shocked Cagemate  $t=0.085$ ,  $df=3$ ,  $p=0.937$ . BLA 1-Way Mirror  $t=2.101$ ,  $df=7$ ,  $p=0.0737$ ; Shocked Cagemate  $t=3.492$ ,  $df=2$ ,  $p=0.0731$ .

**Fig. 2e:** Females, 1-Way ANOVA: DG  $F_{2,18}=0.4501$ ,  $p=0.6445$ . BLA  $F_{2,13}=0.4962$ ,  $p=0.6199$ .

**Fig. 2f:** 1-sample t-test for females, DG Restraint  $t=1.022$ ,  $df=7$ ,  $p=0.3406$ ; 1-Way Mirror  $t=0.9085$ ,  $df=8$ ,  $p=0.3902$ ; Shocked Cagemate  $t=0.3829$ ,  $df=3$ ,  $p=0.7273$ . BLA Restraint  $t=1.496$ ,  $df=6$ ,  $p=0.1852$ ; Shocked Cagemate  $t=7.348$ ,  $df=1$ ,  $p=0.0861$ .

**Correlations of DG to BLA reactivation, Pearson Correlations:** Males, 1-Way:  $n=8$ , Pearson  $r = 0.116$ ,  $p=0.784$ ; Restraint:  $n=4$ , Pearson  $r = 0.869$ ,  $p=0.13$ ; Juvenile Intruder:  $n=9$ , Pearson  $r=0.530$ ,  $p=0.142$ . Females, 1-Way:  $n=6$ , Pearson  $r=-0.266$ ,  $p=0.610$ ; Restraint:  $n=5$ , Pearson  $r=-0.139$ ,  $p=0.823$ .

**Figure 4:** DG ensembles active during social stress drive fear only in previously fear conditioned mice

**Fig. 4e:** 2-Way RM ANOVA light x group  $F_{6,57}=1.628$ ,  $p=0.1560$ ; light  $F_{1,917,36.43}=0.9090$ ,  $p=0.4081$ ; group  $F_{62,19}=3.959$ ,  $p=0.0365$ .

**Fig. 4f:** 2-Way RM ANOVA light x group  $F_{6,57}=3.071$ ,  $p=0.0113$ ; light  $F_{3,57}=0.3763$ ,  $p=0.7704$ ; group  $F_{2,19}=1.645$ ,  $p=0.2193$ .

**Fig. 4g:** 2-Way RM ANOVA light x group  $F_{2, 20}=5.120$ ,  $p=0.0160$ ; group  $F_{2, 20}=1.801$ ,  $p=0.1909$ ; light  $F_{1, 20}=5.315$ ,  $p=0.0320$ .

**Fig. 4h:** 2-Way RM ANOVA light x group  $F_{2, 19}=7.889$ ,  $p=0.0032$ ; group  $F_{2, 19}=2.007$ ,  $p=0.1619$ ; light  $F_{1, 19}=0.1406$ ,  $p=0.7118$ .

**Fig. 4i:** 2-Way RM ANOVA light x group  $F_{6, 36}=0.3690$ ,  $p=0.8938$ ; light  $F_{3, 36}=0.1871$ ,  $p=0.9045$ ; group  $F_{2, 12}=0.7903$ ,  $p=0.4760$ .

**Fig. 4j:** 2-Way RM ANOVA light x group  $F_{6, 36}=1.266$ ,  $p=0.2971$ ; light  $F_{2.559, 30.71}=0.6596$ ,  $p=0.5602$ ; group  $F_{2, 12}=3.119$ ,  $p=0.0812$ .

**Fig. 4k:** 2-Way RM ANOVA light x group  $F_{2, 12}=0.5180$ ,  $p=0.6084$ ; group  $F_{2, 12}=1.062$ ,  $p=0.3762$ ; light  $F_{1, 12}=0.8643$ ,  $p=0.3709$ .

**Fig. 4l:** 2-Way RM ANOVA light x group  $F_{2, 12}=2.285$ ,  $p=0.1443$ ; group  $F_{2, 12}=2.503$ ,  $p=0.1235$ ; light  $F_{1, 12}=0.2462$ ,  $p=0.6287$ .

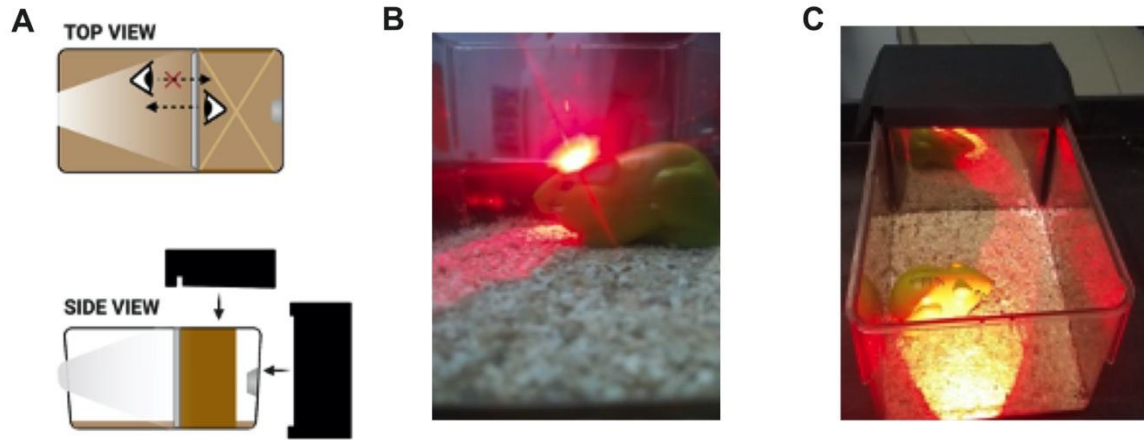

**Fig. S1. 1-Way Mirror Prototype, Related to Methods.** A) Unidirectional visual access allows the recently shocked mouse in the darkened compartment to see the cagemates on the other side of the insert, in the bright compartment. B and C) The cagemates do not see the shocked cagemate in the dark compartment but rather see their own reflections. Auditory-olfactory stimuli are exchanged over the top and sides of the 7" x 11" x 5" insert.

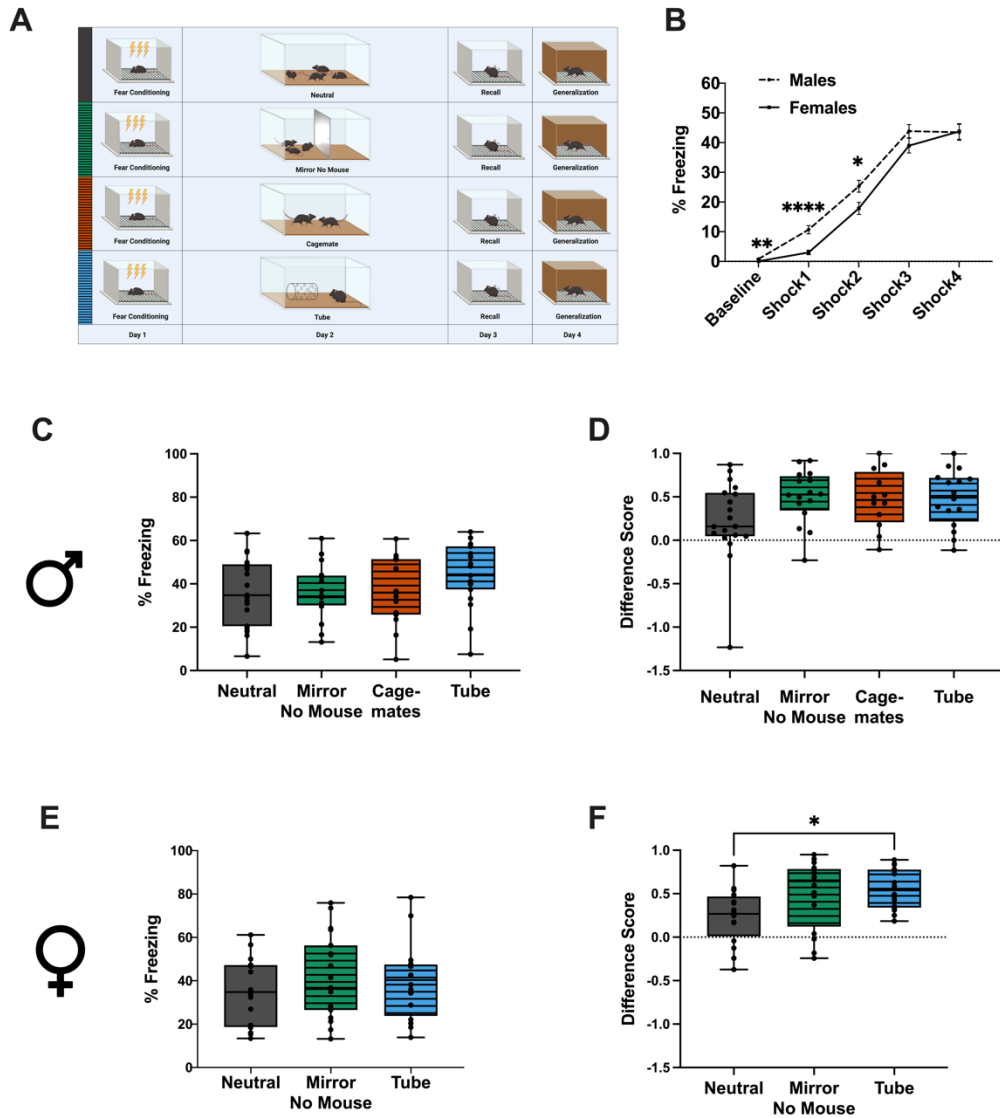

**Fig. S2. Novel objects and neutral social experiences do not impact fear recall. Related to Figure 1.**

**A)** Schematic representation of behavioral schedule. **B)** % freezing throughout fear acquisition in males (dashed) and females (solid). 2 Way RM ANOVA with Sidak's multiple comparison tests of fear acquisition for males vs females,  $n=69$  males,  $n=63$  females; Time x Sex  $F_{(4, 520)}=2.910$ ,  $p=0.0212$ ; Time  $F_{(2.717, 353.3)}=323.8$ ,  $p<0.0001$ ; Sex  $F_{(1, 130)}=4.895$ ,  $p=0.0287$ ; Subject  $F_{(130, 520)}=3.594$ ,  $p<0.0001$ ; Baseline -  $t=3.336$ ,  $p=0.0063$ ; Shock1 -  $t=4.930$ ,  $p<0.0001$ ; Shock2 -

t=2.626, p=0.0475; Shock3 - t=1.464, p=0.5452; Shock4 -t=0.07762, p>0.9999. **C** and **E**)

Freezing levels during a 5 minute fear recall test for males (**C**) and females (**E**). Males: 1-Way ANOVA $F_{(3, 68)}=1.290$ , p=0.2848. Females: 1-Way ANOVA $F_{(2, 48)}=0.5864$ , p=0.5603. **D** and **F**)

Differences scores, defined as [(freezing in recall test)-(freezing in generalization test)]/(freezing in recall test) for males (**D**) and females (**F**). Males: ANOVA $F_{(3, 59)}=2.172$ , p=0.1009. Females:

Kruskal-Wallis statistic=8.115, p=0.0173, Dunn's multiple comparisons Tube vs Neutral

z=2.551, p=0.0323. Boxes extend from 25<sup>th</sup> to 75<sup>th</sup> percentiles, lines show medians, whiskers extend from minimum to maximum.

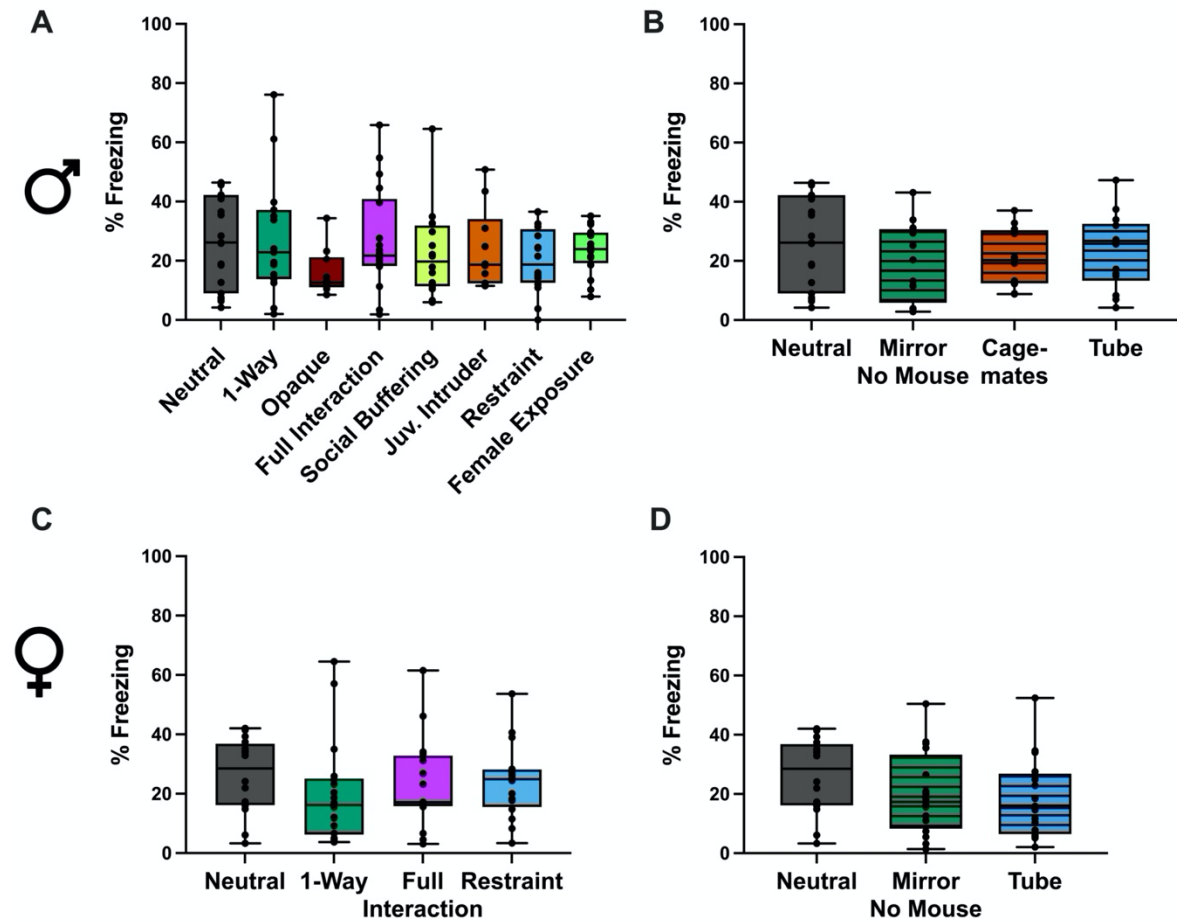

**Fig. S3. Non-normalized freezing generalization context does not differ between groups.**

**Related to Figure 1.** Each graph shows the % freezing during the generalization test, with the Neutral group included as reference. **A)** Experimental Males: Brown-Forsythe ANOVA  $F_{(7, 87.07)}=1.273$ ,  $p=0.2730$ ; **B)** Control Males: 1-Way ANOVA  $F_{(3, 53)}=0.8275$ ,  $p=0.4846$ ; **C)** Experimental Females: ANOVA  $F_{(3, 62)}=0.5153$ ,  $p=0.6733$ ; **D)** Control Females: ANOVA  $F_{(2, 45)}=1.452$ ,  $p=0.2448$ . Boxes extend from 25<sup>th</sup> to 75<sup>th</sup> percentiles, lines show medians, whiskers extend from minimum to maximum.

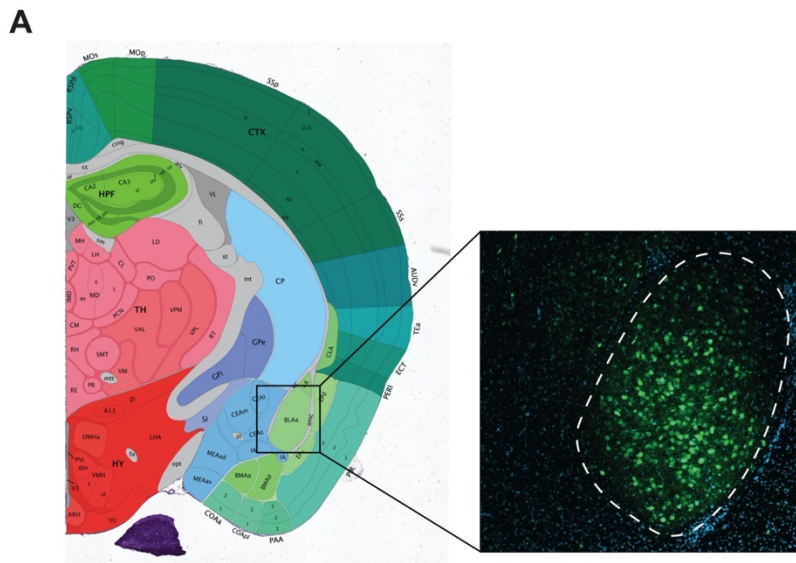

**Fig. S4. BLA histology. Related to Figure 2.** A) Representative 10x confocal image demonstrating the bounds used to define the BLA.

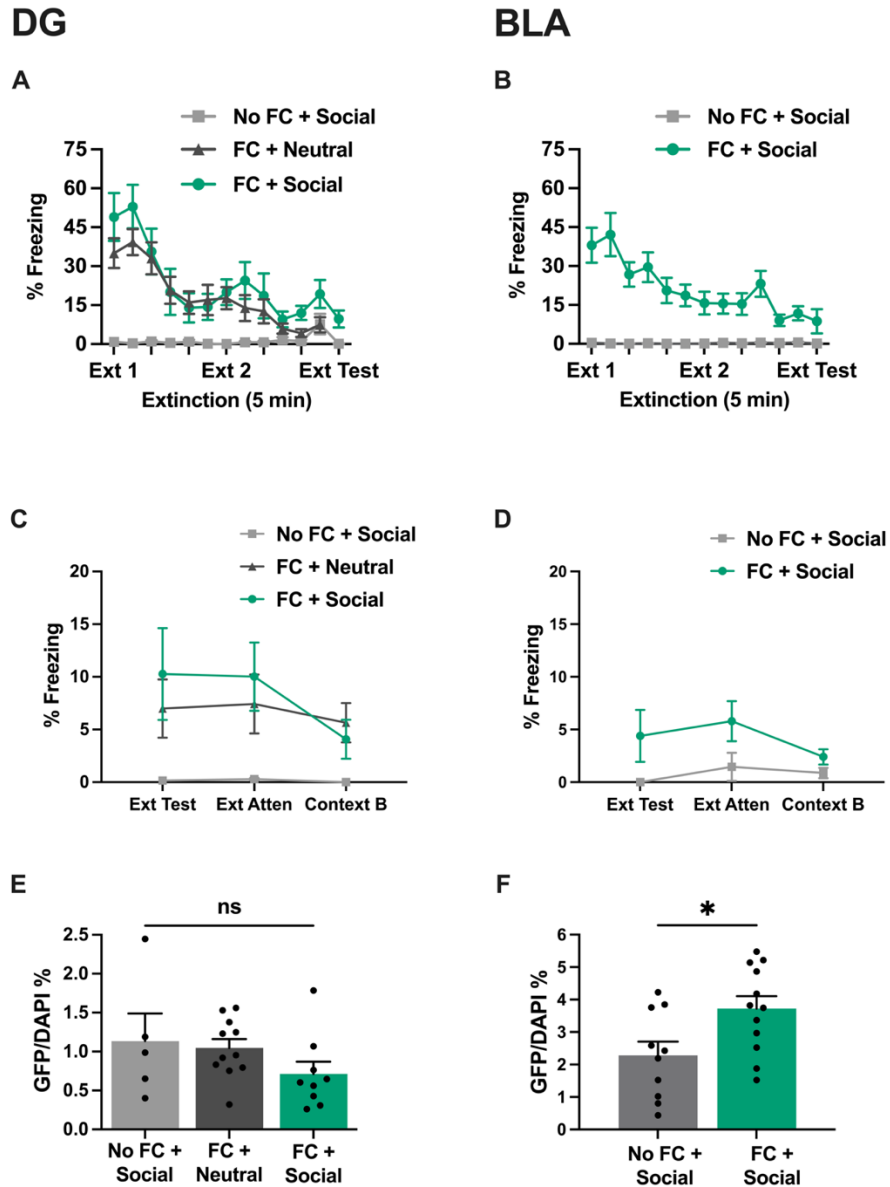

**Fig. S5. Ensemble size and extinction learning curves for optogenetically manipulated groups. Related to Figure 4. A and B) % freezing throughout extinction training across groups. Mixed-effects model (REML), A) time  $p < 0.0001$ , group = 0.0025. B) time  $p = 0.0016$ , group  $< 0.0001$ . C and D) % freezing during ext test, extinction attenuation post stimulation, and context b. E and F) % Chr2-GFP positive cells over total DAPI positive cells. E) 1-Way ANOVA  $F_{2, 22} = 1.497$ ,  $p = 0.2458$ . F) unpaired 2-tailed t-test  $t = 2.528$ ,  $df = 20$ ,  $*p = 0.02$ .**



**Movie S1.**

Representative video of 1-way mirror paradigm for fear conditioned cagemates.

**Movie S2.**

Representative video of juvenile intruder paradigm for fear conditioned cagemates. The experimental resident mouse has two marks at the base of his tail, the intruder has a long solid line from the base to the middle of his tail.

**Dataset S1:** Data for Figure 1

**Dataset S2:** Data for Figure 2

**Dataset S3:** Data for Figure 3

**Dataset S4:** Data for Figure 4

**Dataset S5:** Data for Supplemental Figure 2

**Dataset S6:** Data for Supplemental Figure 3

**Dataset S7:** Data for Supplemental Figure 5
